# Supplementary material
Source: PubMed Central journal article supplement (PMC1480422)

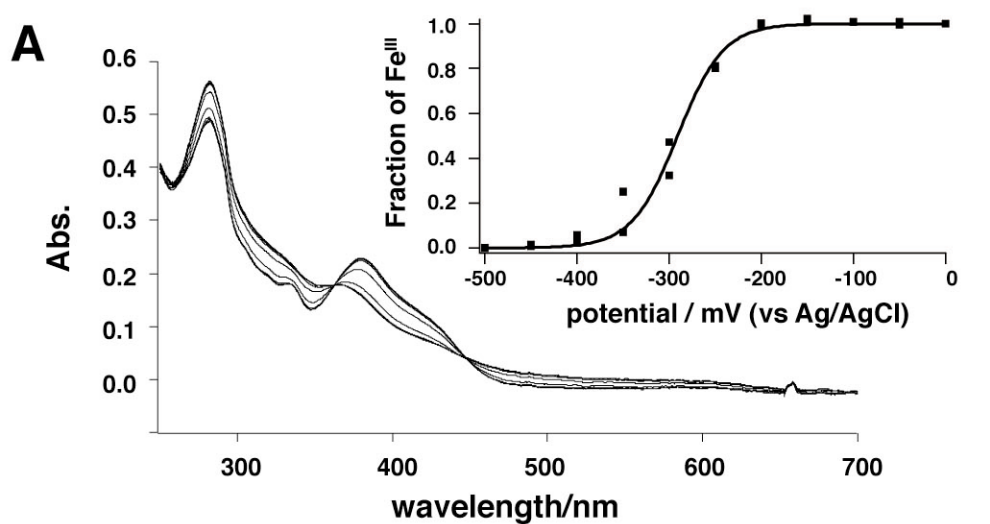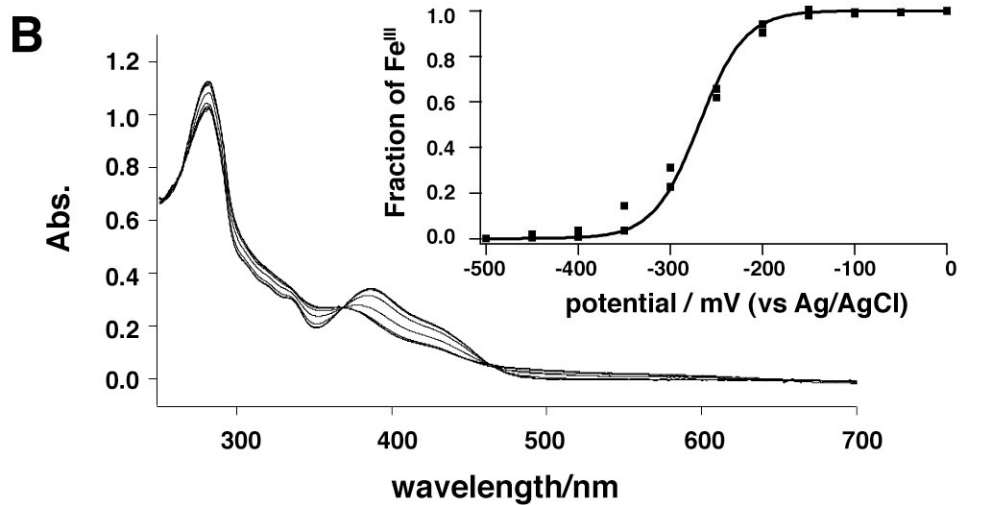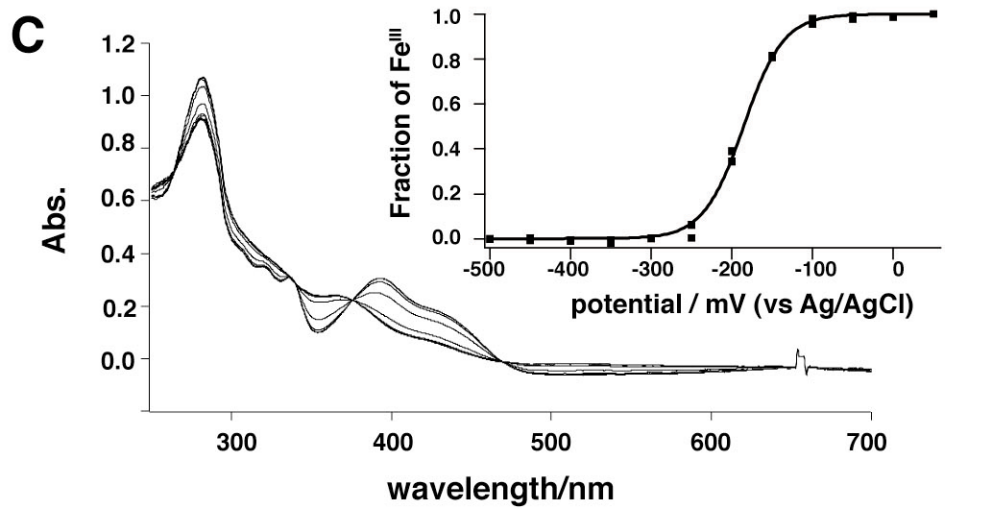

Supplement: pnas_0510968103_1.pdf [file pnas_0510968103_1.pdf]

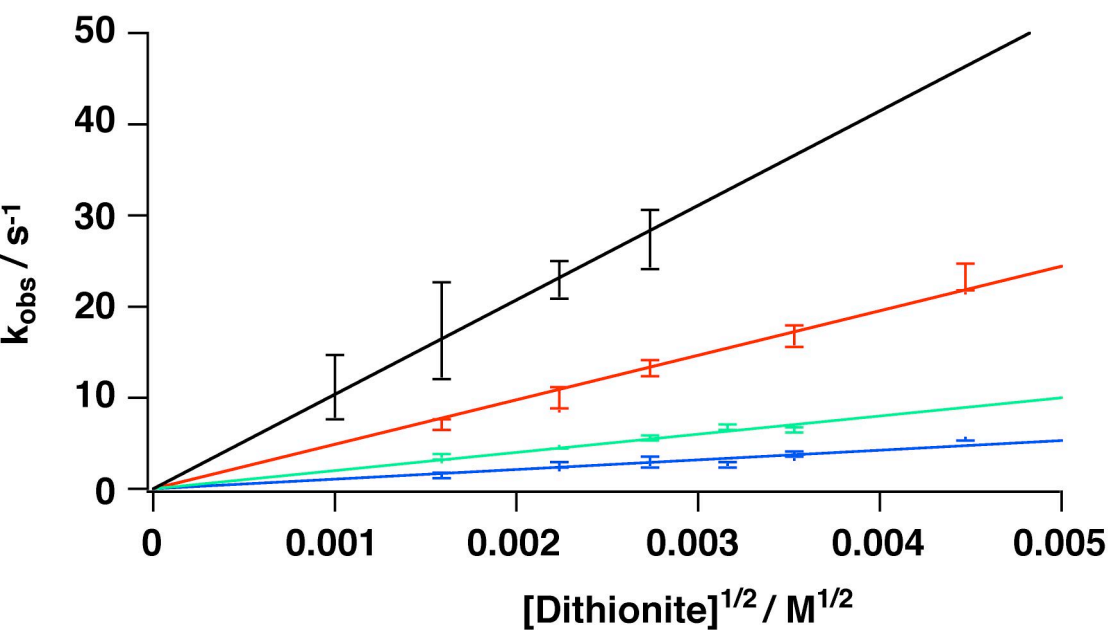

Supplement: pnas_0510968103_2.pdf [file pnas_0510968103_2.pdf]

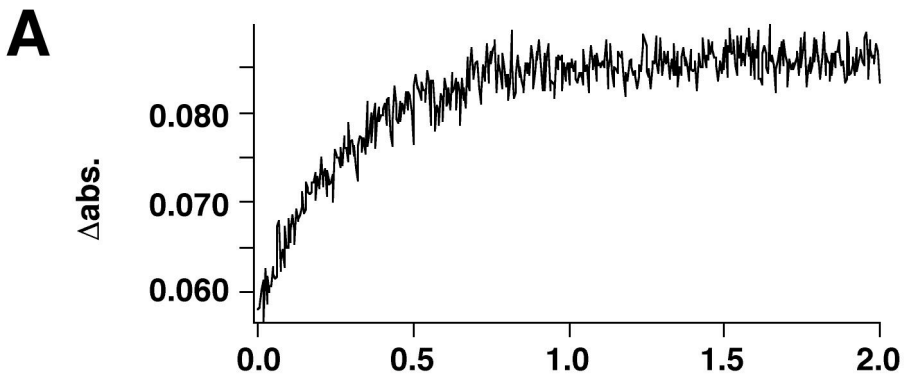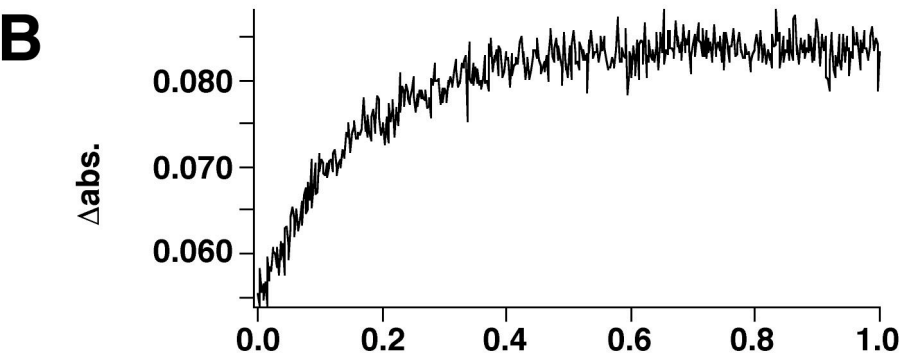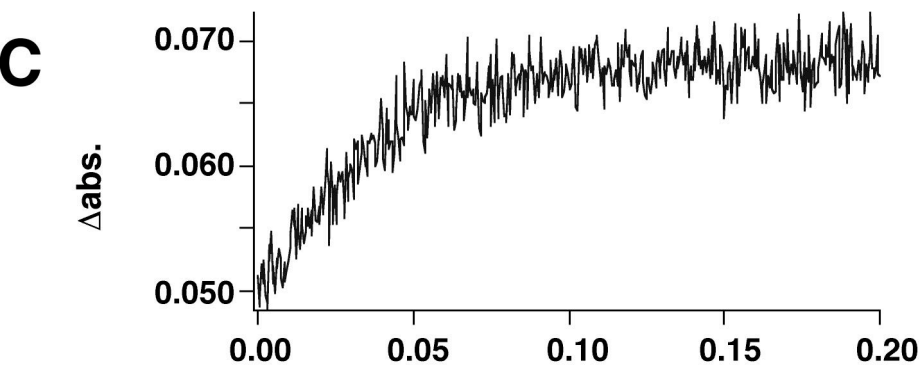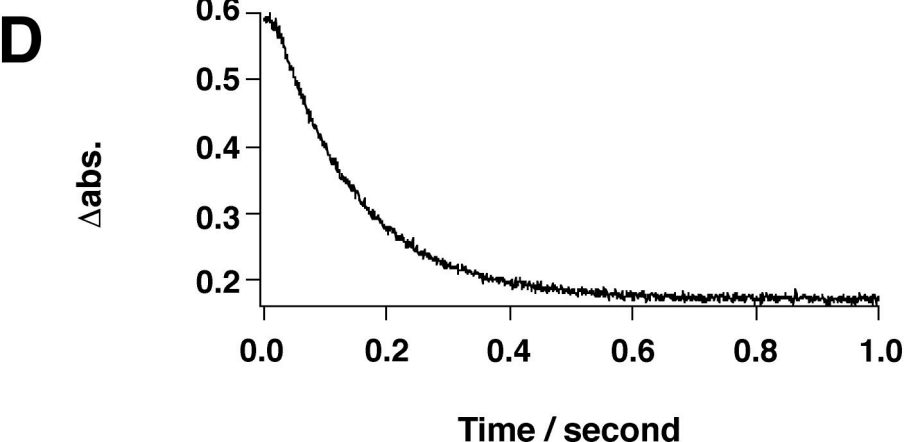

Supplement: pnas_0510968103_3.pdf [file pnas_0510968103_3.pdf]

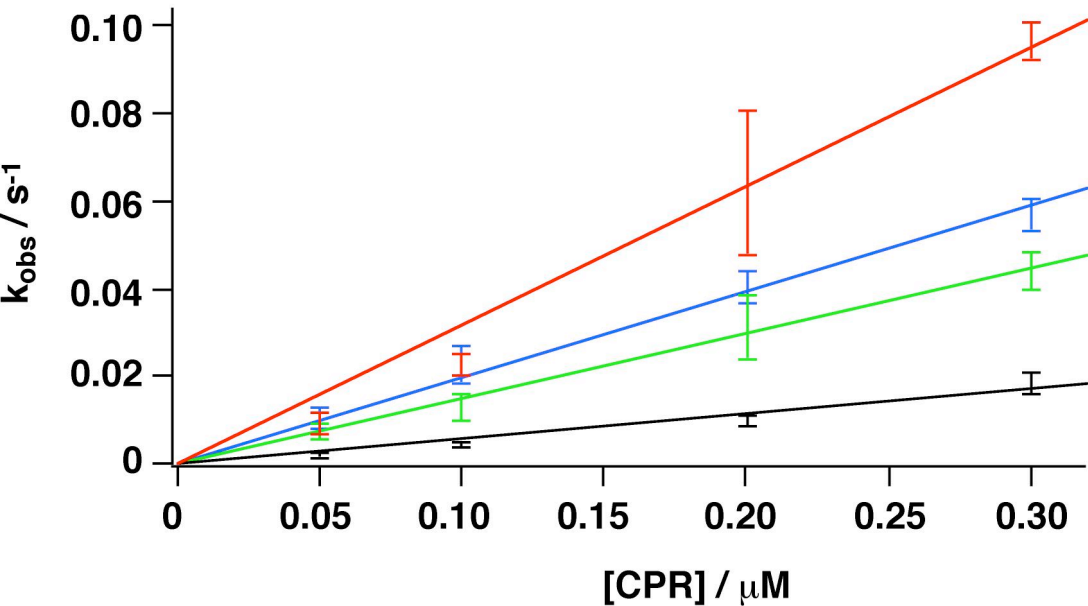

Supplement: pnas_0510968103_4.pdf [file pnas_0510968103_4.pdf]

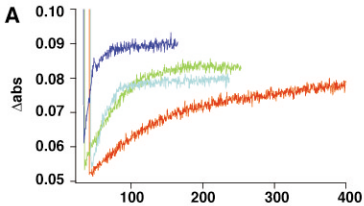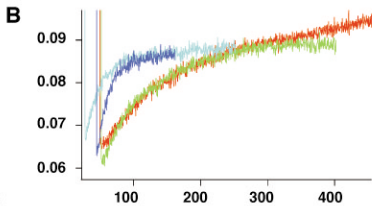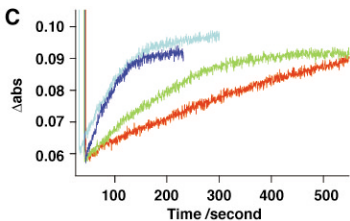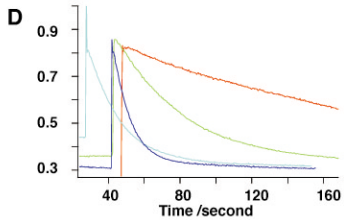

Supplement: pnas_0510968103_5.pdf [file pnas_0510968103_5.pdf]

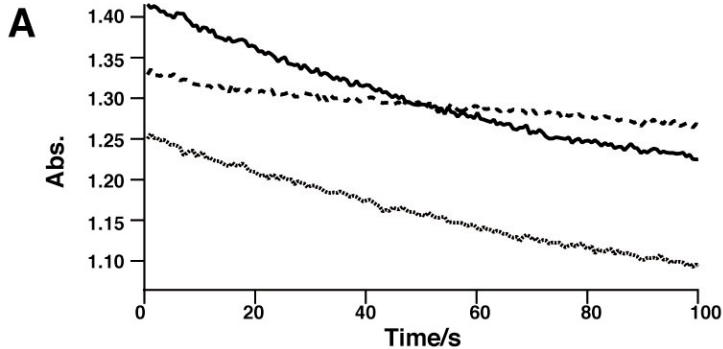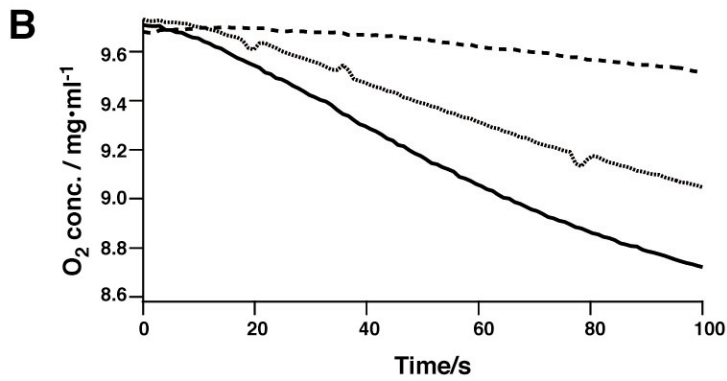

Supplement: pnas_0510968103_6.pdf [file pnas_0510968103_6.pdf]
